# Supplementary material for: Effect of steam and CO2 on ethane activation over Zn-ZSM-5
Source: Royal Society of Chemistry journal article supplement (doi:10.1039/c7cy01850a), 2017-11-20
Supplement: c7cy01850a1.pdf [file c7cy01850a1.pdf]

## Effect of steam and CO<sub>2</sub> in ethane activation on Zn-ZSM-5

*Ali Mehdad, Nicholas S. Gould, Bingjun Xu and Raul F. Lobo\**

Center for Catalytic Science and Technology, Department of Chemical and Biomolecular Engineering, University of Delaware, 150 Academy St., Newark, DE 19716, USA

\*Corresponding Author: [lobo@udel.edu](mailto:lobo@udel.edu)

### Supporting Information

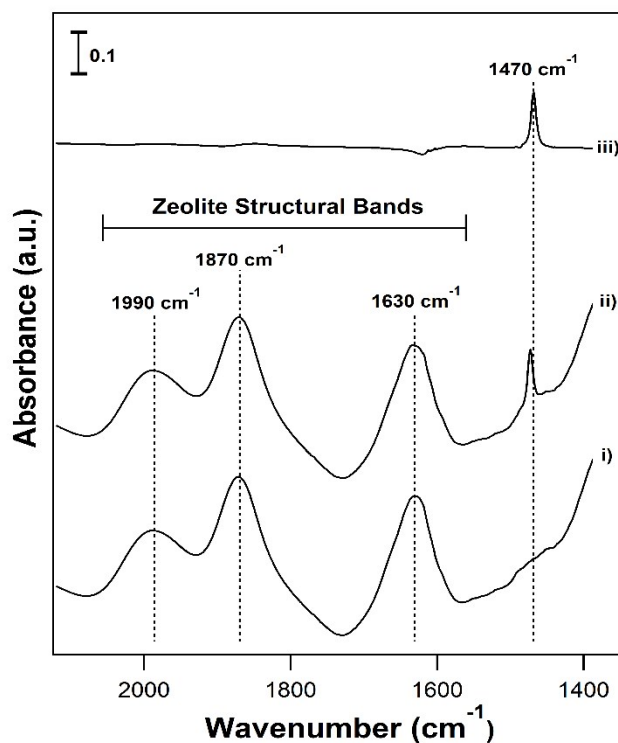

Figure S1: IR spectrum of benzene adsorption at 150 °C on 5% Zn-ZSM-5 (11.5). (i) clean Zn-ZSM-5 at vacuum, (ii) benzene adsorption on Zn-ZSM-5 at vacuum, and (iii) subtraction of ii and iii.

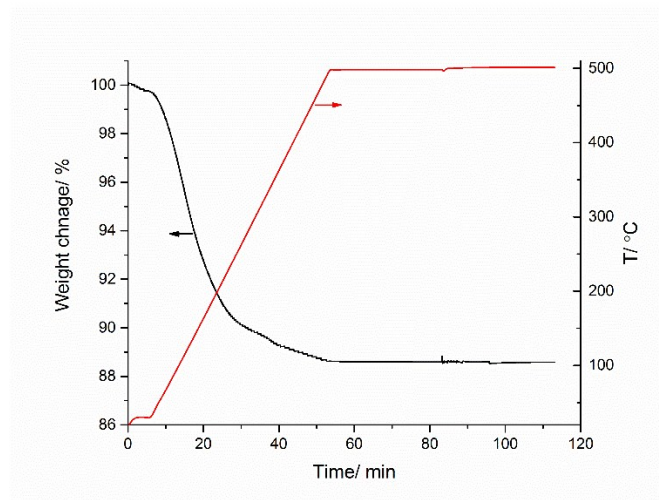

Figure S2: Weight change of 5% Zn-ZSM-5 (11.5) during thermal treatment in 100% CO<sub>2</sub>.
